# Supplementary material for: Trends in scale and shape of survival curves
Source: PubMed Central journal article supplement — Sci Rep. 2012 Jul 11;2:504. doi: 10.1038/srep00504 (PMC3394084; doi:10.1038/srep00504), 2012-07-11
Supplement: srep00504-s1.pdf [file srep00504-s1.pdf]

# Trends in scale and shape of survival curves

Byung Mook Weon<sup>1,\*</sup> & Jung Ho Je<sup>1,\*</sup>

<sup>1</sup>X-ray Imaging Center, Department of Materials Science and Engineering, Pohang University of Science and Technology, San 31, Hyoja-dong, Pohang, 790-784, Korea

\*E-mail: [bmweon@hotmail.com](mailto:bmweon@hotmail.com) or [jhje@postech.ac.kr](mailto:jhje@postech.ac.kr).

## Supplementary Table S1.

The graphical measurements of the characteristic life ( $\alpha$ ) from the survival curve at the age for  $s(\alpha) = \exp(-1) \approx 0.367879$  (a standard deviation in measurements  $\approx 3 \times 10^{-5}$ ). Data source: Swedish female life tables (period, 1 x 1) from the Human Mortality Database (<http://www.mortality.org>).

| year | $\alpha$ (years) | year | $\alpha$ (years) | year | $\alpha$ (years) |
|------|------------------|------|------------------|------|------------------|
| 1950 | 80.0525          | 1970 | 83.6787          | 1990 | 86.5397          |
| 1951 | 80.3035          | 1971 | 83.8454          | 1991 | 86.7595          |
| 1952 | 80.6391          | 1972 | 83.9854          | 1992 | 86.9433          |
| 1953 | 80.5884          | 1973 | 84.1579          | 1993 | 86.7934          |
| 1954 | 80.9887          | 1974 | 84.2919          | 1994 | 87.3893          |
| 1955 | 81.2295          | 1975 | 84.2641          | 1995 | 87.3779          |
| 1956 | 81.3343          | 1976 | 84.2969          | 1996 | 87.4592          |
| 1957 | 81.1717          | 1977 | 84.8430          | 1997 | 87.7033          |
| 1958 | 81.5393          | 1978 | 84.8745          | 1998 | 87.7737          |
| 1959 | 81.8789          | 1979 | 85.0024          | 1999 | 87.6986          |
| 1960 | 81.6369          | 1980 | 85.0665          | 2000 | 87.8836          |
| 1961 | 82.0544          | 1981 | 85.2333          | 2001 | 87.8933          |
| 1962 | 81.9802          | 1982 | 85.5888          | 2002 | 87.8657          |
| 1963 | 82.3428          | 1983 | 85.7992          | 2003 | 88.2213          |
| 1964 | 82.5337          | 1984 | 86.0353          | 2004 | 88.4649          |
| 1965 | 82.7467          | 1985 | 85.8699          | 2005 | 88.5502          |
| 1966 | 82.9233          | 1986 | 86.1312          | 2006 | 88.6732          |
| 1967 | 82.9847          | 1987 | 86.3034          | 2007 | 88.5896          |
| 1968 | 82.8098          | 1988 | 86.1488          | 2008 | 88.7732          |
| 1969 | 83.0654          | 1989 | 86.6936          | 2009 | 89.3028          |
|      |                  |      |                  | 2010 | 89.3801          |

## Supplementary Table S2.

The linear regression results of the death rate,  $\ln(\mu(x)) = \ln(a) + bx$ , and the survival plasticity,  $\beta(x) = \beta_0 + \beta_1x$ , for the middle ages of 40–80 years ( $R^2$  = the coefficient of determination).

Data source: Swedish female death rates (period, 1 x 1) from the Human Mortality Database (<http://www.mortality.org>).

| year | $b$    | $\ln(a)$ | $R^2$  | $\beta_1$ | $\beta_0$ | $R^2$  |
|------|--------|----------|--------|-----------|-----------|--------|
| 1980 | 0.0953 | -10.5540 | 0.9890 | 0.1119    | 0.3569    | 0.9950 |
| 1981 | 0.1000 | -10.8960 | 0.9902 | 0.1112    | 0.5343    | 0.9965 |
| 1982 | 0.0985 | -10.8190 | 0.9928 | 0.1084    | 0.6007    | 0.9967 |
| 1983 | 0.0969 | -10.7570 | 0.9903 | 0.1142    | 0.2954    | 0.9955 |
| 1984 | 0.0973 | -10.7990 | 0.9907 | 0.1096    | 0.5984    | 0.9964 |
| 1985 | 0.0995 | -10.9390 | 0.9942 | 0.1132    | 0.3667    | 0.9968 |
| 1986 | 0.0975 | -10.8310 | 0.9901 | 0.1121    | 0.4699    | 0.9946 |
| 1987 | 0.0967 | -10.7850 | 0.9928 | 0.1103    | 0.5231    | 0.9953 |
| 1988 | 0.0954 | -10.6820 | 0.9902 | 0.1105    | 0.5003    | 0.9956 |
| 1989 | 0.0952 | -10.7390 | 0.9913 | 0.1126    | 0.4232    | 0.9947 |
| 1990 | 0.0969 | -10.8300 | 0.9916 | 0.1118    | 0.4869    | 0.9936 |
| 1991 | 0.0958 | -10.7680 | 0.9942 | 0.1087    | 0.6190    | 0.9935 |
| 1992 | 0.0966 | -10.8320 | 0.9941 | 0.1019    | 1.0851    | 0.9956 |
| 1993 | 0.0990 | -11.0090 | 0.9908 | 0.1092    | 0.7657    | 0.9949 |
| 1994 | 0.0947 | -10.7690 | 0.9895 | 0.1070    | 0.8376    | 0.9868 |
| 1995 | 0.0967 | -10.9010 | 0.9936 | 0.1043    | 1.0922    | 0.9909 |
| 1996 | 0.0983 | -11.0170 | 0.9928 | 0.1029    | 1.1904    | 0.9916 |
| 1997 | 0.0987 | -11.0820 | 0.9935 | 0.1050    | 1.1119    | 0.9943 |
| 1998 | 0.0972 | -10.9930 | 0.9955 | 0.1054    | 1.1009    | 0.9914 |
| 1999 | 0.0959 | -10.8980 | 0.9941 | 0.1056    | 1.1535    | 0.9893 |
| 2000 | 0.0987 | -11.0930 | 0.9909 | 0.1017    | 1.3523    | 0.9829 |
| 2001 | 0.0990 | -11.1280 | 0.9931 | 0.1032    | 1.3032    | 0.9868 |
| 2002 | 0.1003 | -11.2300 | 0.9934 | 0.1060    | 1.1997    | 0.9900 |
| 2003 | 0.0993 | -11.1920 | 0.9949 | 0.1052    | 1.2099    | 0.9908 |
| 2004 | 0.0996 | -11.2380 | 0.9942 | 0.1038    | 1.2910    | 0.9911 |
| 2005 | 0.1002 | -11.2780 | 0.9941 | 0.1000    | 1.5289    | 0.9859 |
| 2006 | 0.0999 | -11.2930 | 0.9957 | 0.1057    | 1.2132    | 0.9905 |
| 2007 | 0.1007 | -11.3480 | 0.9949 | 0.1073    | 1.2251    | 0.9907 |
| 2008 | 0.0988 | -11.2530 | 0.9947 | 0.1083    | 1.1542    | 0.9861 |
| 2009 | 0.0990 | -11.3140 | 0.9952 | 0.1052    | 1.3478    | 0.9902 |
| 2010 | 0.1045 | -11.7070 | 0.9941 | 0.1062    | 1.3962    | 0.9943 |

### Supplementary Table S3.

The graphical measurements of the characteristic life ( $\alpha$ ) from the survival curve at the age for  $s(\alpha) = \exp(-1) \approx 0.367879$ . Data source: (left column) Swedish female cohort life tables (1 x 1) for Fig. 3 and (right column) female period life tables (1 x 1) for Fig. 4 from selected wealthy countries: Japan, France, Switzerland, Australia, the USA, and the UK from the Human Mortality Database (<http://www.mortality.org>).

| Country                | calendar year | $\alpha$ (years)    | Country                     | calendar year | $\alpha$ (years) |
|------------------------|---------------|---------------------|-----------------------------|---------------|------------------|
| <b>Sweden (cohort)</b> | 1870          | 73.4190             | <b>Japan (period)</b>       | 1980          | 84.8082          |
|                        | 1871          | 73.4630             |                             | 1985          | 86.4097          |
|                        | 1872          | 73.1804             |                             | 1990          | 87.5975          |
|                        | 1873          | 73.0854             |                             | 1995          | 88.6653          |
|                        | 1874          | 72.8293             |                             | 2000          | 90.4676          |
|                        | 1875          | 73.1137             | <b>France (period)</b>      | 1980          | 85.2641          |
|                        | 1876          | 73.4639             |                             | 1985          | 86.0157          |
|                        | 1877          | 73.9806             |                             | 1990          | 87.4475          |
|                        | 1878          | 74.4143             |                             | 1995          | 88.3434          |
|                        | 1879          | 74.7990             |                             | 2000          | 89.0090          |
|                        | 1880          | 74.9574             | <b>Switzerland (period)</b> | 1980          | 85.3064          |
|                        | 1881          | 75.2238             |                             | 1985          | 86.4250          |
|                        | 1882          | 75.2355             |                             | 1990          | 86.9817          |
|                        | 1883          | 75.7363             |                             | 1995          | 87.9358          |
|                        | 1884          | 76.1390             |                             | 2000          | 88.5698          |
|                        | 1885          | 76.2851             | <b>Australia (period)</b>   | 1980          | 84.9866          |
|                        | 1886          | 76.5915             |                             | 1985          | 85.2625          |
|                        | 1887          | 76.9657             |                             | 1990          | 86.5231          |
|                        | 1888          | 77.2315             |                             | 1995          | 87.4262          |
|                        | 1889          | 77.4440             |                             | 2000          | 88.5184          |
| 1890                   | 77.6506       | <b>USA (period)</b> | 1980                        | 85.1661       |                  |
| 1891                   | 78.1672       |                     | 1985                        | 85.6220       |                  |
| 1892                   | 78.7910       |                     | 1990                        | 86.2846       |                  |
| 1893                   | 79.0562       |                     | 1995                        | 86.4446       |                  |
| 1894                   | 79.3368       |                     | 2000                        | 86.6584       |                  |
| 1895                   | 79.4349       | <b>UK (period)</b>  | 1980                        | 83.4746       |                  |
| 1896                   | 79.8486       |                     | 1985                        | 83.9928       |                  |
| 1897                   | 80.0487       |                     | 1990                        | 85.0045       |                  |
| 1898                   | 80.3385       |                     | 1995                        | 85.4905       |                  |
| 1899                   | 80.6981       |                     | 2000                        | 86.4482       |                  |
| 1900                   | 81.1434       |                     |                             |               |                  |

## Supplementary Figure S1.

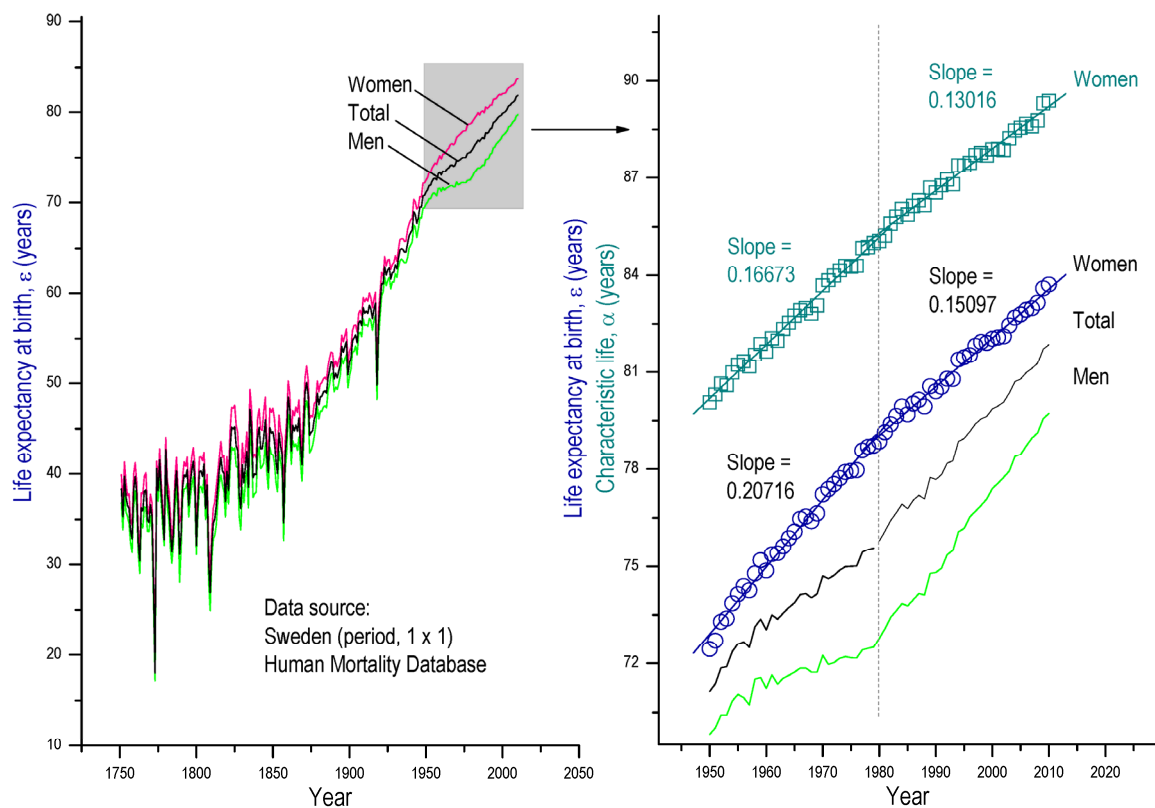

**Figure S1.** A comparison between the characteristic life ( $\alpha$ ) in Fig. 1c and Supplementary Table 1 (our method) and the life expectancy at birth ( $\epsilon$ ) (general method). The life expectancy at birth is the average number of years that a newborn is expected to live. The data for the life expectancy at birth (period, 1 x 1) for Swedish women (circles), for men, and for total (men and women) were taken from the Human Mortality Database (<http://www.mortality.org>). The similar trends in the historic trends between  $\alpha$  (squares) and  $\epsilon$  (circles) for women suggest the usefulness of the characteristic life as an indicator of lifespan evolution (scale effect in survival curves). The slope decrease at 1980 is found at both cases of  $\alpha$  (0.16673→0.13016) and  $\epsilon$  (0.20716→0.15097) for women. The apparent acceleration in total (men and women) at 1980 is attributed to the acceleration of the life expectancy for men.

## Supplementary Figure S2.

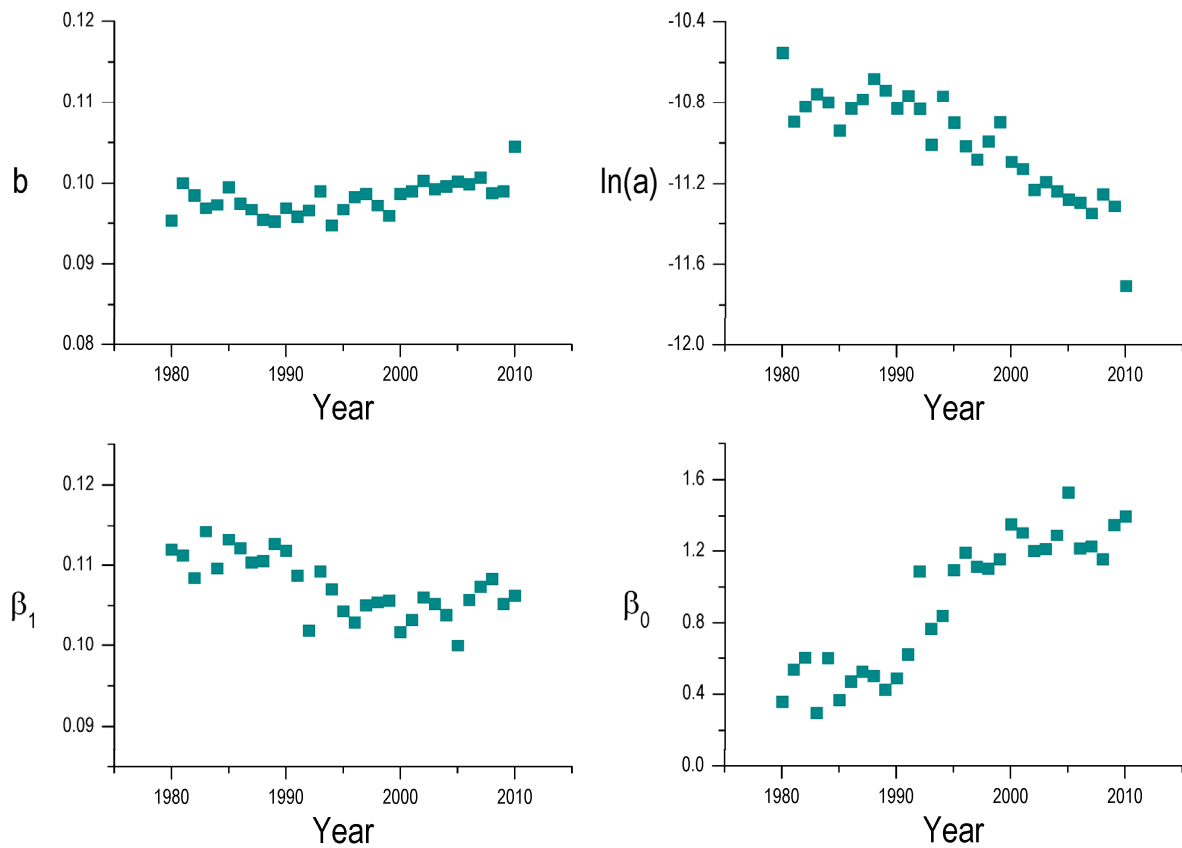

**Figure S2.** The historic trends of the parameters:  $b$  and  $\ln(a)$  from the death rates,  $\ln(\mu(x)) = \ln(a) + bx$  (linear fits in Fig. 2b), and  $\beta_1$  and  $\beta_0$  from the survival plasticity,  $\beta(x) = \beta_0 + \beta_1x$  (linear fits in Fig. 2d). Interestingly, the absolute values for the intercepts,  $\ln(a)$  and  $\beta_0$ , gradually increase with calendar year, while the slopes,  $b$  and  $\beta_1$ , are almost invariant. This is a reason for the negative linear correlation between the parameters.

## Additional Discussion.

Complex relationships between life and death processes could be relevant to many biological and non-biological factors involved in human survival and in the dynamics of aging. Possible factors are listed as follows.

- I. Survival instinct can increase complexity between life and death rates in biological survival games [1,2].
- II. Life can be maintained by exchanging matter, energy, and information from surroundings [3,4] and by coping with genetic and environmental fluctuation [5].
- III. To cope with hostile environmental conditions, biological capability such as physiological complexity would be essential [6].
- IV. Intelligence would be favorable to select optimum strategies for health and survival: smart individuals may have better survival chance against harsh exigencies and unpredictable changes of daily life [7,8].
- V. Cooperation or competition of individuals with neighbors may improve flexibility in survival strategies: better strategies between cooperation and competition should be properly selected in survival games [9–12].
- VI. Altruism may be an important strategy for survival of an entire population [13–15].

## References

- [1] Recordati, G. & Bellini, T. G. A definition of internal constancy and homeostasis in the context of non-equilibrium thermodynamics. *Exp. Physiol.* **89**, 27–38 (2003).
- [2] Lande, R. Adaptation to an extraordinary environment by evolution of phenotypic plasticity and genetic assimilation. *J. Evol. Biol.* **22**, 1435–1446 (2009).
- [3] Goldberger, A. L., et al. Fractal dynamics in physiology: alterations with disease and aging. *Proc. Natl. Acad. Sci. USA* **99**, 2466–2472 (2002).
- [4] Kaplan, H. S. & Robson, A. J. The emergence of humans: The coevolution of intelligence and longevity with intergenerational transfers. *Proc. Natl. Acad. Sci. USA* **99**, 10221–10226 (2002).
- [5] Finch, C. E. Evolution of the human lifespan and diseases of aging: Roles of infection, inflammation, and nutrition. *Proc. Natl. Acad. Sci. USA* **107**, 1718–1724 (2010).
- [6] Griffin, A. S., West, S. A. & Buckling, A. Cooperation and competition in pathogenic bacteria. *Nature* **430**, 1024–1027 (2004).
- [7] West, S. A., Griffin, A. S. & Gardner, A. Evolutionary explanations for cooperation. *Curr. Biol.* **24**, 661–672 (2007).
- [8] Fujiwara, M., Pfeiffer, G., Boggess, M., Day, S. & Walton, J. Coexistence of competing stage-structured populations. *Scientific Reports* **1**, 107 (2011).
- [9] Cremer, J., Melbinger, A. & Frey, E. Growth dynamics and the evolution of cooperation in microbial populations. *Scientific Reports* **2**, 281 (2012).
- [10] Fehr, E. & Fischbacher, U. The nature of human altruism. *Nature* **425**, 785–791 (2003).
- [11] Rozenfeld, A. F., Gruver, J. L., Albano, E. V. & Havlin, S. Altruism: a natural strategy for enhancing survival. *Physica A* **369**, 817–822 (2006).
- [12] Silka, J. B. & Housea, B. R. Evolutionary foundations of human prosocial sentiments. *Proc. Natl. Acad. Sci. USA* **108**, 10910–10917 (2011).
- [13] Kirkwood, T. B. L. Human senescence. *BioEssays* **18**, 1009–1016 (1996).
- [14] Kirkwood, T. B. L. Systems biology of ageing and longevity. *Phil. Trans. R. Soc. Lond. B* **366**, 64–70 (2011).
- [15] Kirkwood, T. B. L. & Austad, S. N. Why do we age? *Nature* **408**, 233–238 (2000).
